# Supplementary material for: Epirubicin and Cyclophosphamide, Methotrexate, and Fluorouracil as Adjuvant Therapy for Early Breast Cancer
Source: Atypon-hosted journal article supplement (doi:10.1056/nejmoa052084), 2006-11-02
Supplement: nejm_poole_sa1.pdf [file nejm_poole_sa1.pdf]

## Supplementary Appendix

This appendix has been provided by the authors to give readers additional information about their work.

Supplement to: Poole CJ, Earl HM, Hiller L, et al. Epirubicin and cyclophosphamide, methotrexate, and fluorouracil as adjuvant therapy for early breast cancer. *N Engl J Med* 2006;355:1851-62.

## Supplement 1 – Clinicians who recruited >1% of trial patients

|               |                  |                                              | <b>Patients</b> |
|---------------|------------------|----------------------------------------------|-----------------|
| <b>NEAT</b>   | Dr RJ Grieve     | Walsgrave Hospital, Coventry                 | 235             |
|               | Dr D Spooner     | City Hospital NHS Trust, Birmingham          | 134             |
|               | Dr RK Agrawal    | Royal Shrewsbury Hospital                    | 96              |
|               | Dr CJ Poole      | Selly Oak Hospital, Birmingham               | 91              |
|               | Dr IN Fernando   | The Manor Hospital, Walsall                  | 87              |
|               | Dr AM Brunt      | North Staffs Royal Infirmary, Stoke on Trent | 79              |
|               | Dr SM O'Reilly   | Clatterbridge Hospital, Merseyside           | 70              |
|               | Dr SM Crawford   | Airedale General Hospital                    | 69              |
|               | Dr D Rea         | Selly Oak Hospital, Birmingham               | 59              |
|               | Dr P Simmonds    | Royal South Hampshire Hospital, Southampton  | 59              |
|               | Dr J Mansi       | St Georges Hospital, London                  | 58              |
|               | Dr H Earl        | Addenbrookes Hospital, Cambridge             | 47              |
|               | Dr PA Murray     | Essex County Hospital                        | 38              |
|               | Dr VH Hall       | Royal Hampshire County Hospital              | 34              |
|               | Dr K McAdam      | Peterborough District Hospital               | 34              |
|               | Dr TJ Perren     | St James University Hospital, Leeds          | 32              |
|               | Dr C Bradley     | Bradford Royal Infirmary                     | 31              |
|               | Dr M Soukop      | Glasgow Royal Infirmary                      | 30              |
|               | Dr C Price       | Bristol Oncology Centre                      | 28              |
|               | Dr RC Mehra      | New Cross Hospital, Wolverhampton            | 27              |
|               | Dr NSA Stuart    | Ysbyty Gwynedd (Bangor)                      | 26              |
|               | Dr DA Jones      | Warwick General Hospital, Coventry           | 24              |
|               | Dr K Benstead    | Cheltenham General Hospital                  | 23              |
|               | Dr J Joffe       | Huddersfield Royal Infirmary                 | 23              |
|               | Dr AG Goodman    | Worcester Royal Infirmary                    | 21              |
|               | Dr T Mughal      | Royal Preston Hospital, Manchester           | 21              |
| <b>BR9601</b> | Prof RCF Leonard | Western General Hospital, Edinburgh          | 64              |

|                 |                                      |    |
|-----------------|--------------------------------------|----|
| Dr D Whillis    | Raigmore, Inverness                  | 41 |
| Dr A Hutcheon   | Aberdeen Royal Infirmary             | 37 |
| Dr A Harnett    | Beatson Oncology Centre, Glasgow     | 33 |
| Dr PA Canney    | Beatson Oncology Centre, Glasgow     | 31 |
| Prof CJ Twelves | Beatson Oncology Centre, Glasgow     | 29 |
| Dr J Dewar      | Ninewells, Dundee                    | 25 |
| Dr AS Bulman    | James Paget Hospital, Great Yarmouth | 19 |
| Dr D Cameron    | Western General Hospital, Edinburgh  | 19 |
| Prof R Coleman  | Weston Park, Sheffield               | 18 |
| Dr C Martin     | James Paget Hospital, Great Yarmouth | 14 |
| Dr H Yosef      | Beatson Oncology Centre, Glasgow     | 9  |
| Dr DM Ritchie   | Beatson Oncology Centre, Glasgow     | 6  |
| Dr TRJ Evans    | Beatson Oncology Centre, Glasgow     | 5  |
| Dr L Mathieson  | Western General Hospital, Edinburgh  | 4  |

## **Supplement 2 – Dose Intensity**

### **A) Calculations**

Individual drug delivered dose intensities (dDDI) were calculated using patients' body surface area, received doses and cycle duration. Cycle DDIs (cDDI) were calculated as the average of the dDDI's planned for that cycle; course DDI (CDDI) as the average of cDDIs over the planned number of cycles, per patient.

### **B) Results**

NEAT's EcCMF patients achieved significantly higher CDDI than cCMF patients (median 94% vs 92%,  $p < 0.001$ ). Additionally, the proportion of NEAT patients receiving an adequate CDDI ( $\geq 85\%$ ) was significantly higher in the EcCMF arm (83% vs 76% CDDI,  $p < 0.001$ ).

CDDI did not differ significantly between BR9601 treatments (median 96% ECMF\* vs 93% CMF\*,  $p = 0.06$ ). However, the proportion of BR9601 patients receiving adequate CDDI was significantly higher for ECMF\* (88% vs 74%,  $p = 0.001$ ).

**Supplement Table 3 – Tumour Characteristics**

|                           | <b>NEAT (N=2021)</b> |                 | <b>BR9601 (N=370)</b> |                | <b>OVERALL (N=2391)</b> |                 |
|---------------------------|----------------------|-----------------|-----------------------|----------------|-------------------------|-----------------|
|                           | <b>EcCMF</b>         | <b>cCMF</b>     | <b>ECMF*</b>          | <b>CMF*</b>    | <b>ECMF</b>             | <b>CMF</b>      |
|                           | <b>(N=1009)</b>      | <b>(N=1012)</b> | <b>(N=180)</b>        | <b>(N=190)</b> | <b>(N=1189)</b>         | <b>(N=1202)</b> |
| <b>Nodal Involvement</b>  |                      |                 |                       |                |                         |                 |
| 0 nodes involved          | 315 (31)             | 311 (31)        | 21 (12)               | 26 (14)        | 336 (28)                | 337 (28)        |
| 1-3 nodes involved        | 456 (45)             | 459 (45)        | 108 (60)              | 106 (56)       | 564 (48)                | 565 (47)        |
| 4+ nodes involved         | 238 (24)             | 242 (24)        | 51 (28)               | 58 (30)        | 289 (24)                | 300 (25)        |
| <b>ER status</b>          |                      |                 |                       |                |                         |                 |
| Positive                  | 517 (51)             | 469 (46)        | 106 (59)              | 95 (50)        | 623 (52)                | 564 (47)        |
| Negative                  | 312 (31)             | 330 (33)        | 56 (31)               | 63 (33)        | 368 (31)                | 393 (33)        |
| Unknown                   | 180 (18)             | 213 (21)        | 18 (10)               | 32 (17)        | 198 (17)                | 245 (20)        |
| <b>Tumour Type</b>        |                      |                 |                       |                |                         |                 |
| Ductal                    | 820 (81)             | 814 (80)        | 151 (84)              | 149 (79)       | 971 (81.5)              | 963 (80)        |
| Lobular                   | 88 (9)               | 95 (9)          | 16 (9)                | 21 (11)        | 104 (8.75)              | 116 (10)        |
| Medullary                 | 14 (1)               | 14 (1)          | 0 (0)                 | 2 (1)          | 14 (1)                  | 16 (1)          |
| Tubular                   | 9 (1)                | 4 (1)           | 0 (0)                 | 0 (0)          | 9 (1)                   | 4 (0.25)        |
| Papillary                 | 1 (1)                | 0 (0)           | 2 (1)                 | 0 (0)          | 3 (0.25)                | 0 (0)           |
| Other                     | 62 (6)               | 68 (7)          | 8 (4)                 | 14 (7)         | 70 (6)                  | 82 (7)          |
| Unknown                   | 15 (1)               | 17 (2)          | 3 (2)                 | 4 (2)          | 18 (1.5)                | 21 (1.75)       |
| <b>Tumour grade</b>       |                      |                 |                       |                |                         |                 |
| 1 - Well Differentiated   | 58 (6)               | 71 (7)          | 15 (8)                | 7 (4)          | 73 (6)                  | 78 (7)          |
| 2 - Mod Differentiated    | 360 (36)             | 323 (32)        | 55 (31)               | 71 (37)        | 415 (35)                | 394 (33)        |
| 3 - Poorly Differentiated | 576 (57)             | 608 (60)        | 104 (58)              | 106 (56)       | 680 (57)                | 714 (59)        |
| Unknown                   | 15 (1)               | 10 (1)          | 6 (3)                 | 6 (3)          | 21 (2)                  | 16 (1)          |
| <b>Tumour size</b>        |                      |                 |                       |                |                         |                 |

|             |          |            |          |          |          |            |
|-------------|----------|------------|----------|----------|----------|------------|
| ≤2cm        | 432 (43) | 451 (44.5) | 72 (40)  | 66 (34)  | 504 (42) | 517 (43)   |
| >2 and ≤5cm | 495 (49) | 486 (48)   | 100 (56) | 108 (57) | 595 (50) | 594 (49.5) |
| >5cms       | 54 (5)   | 55 (5.5)   | 6 (3)    | 9 (5)    | 60 (5)   | 64 (5.25)  |
| Unknown     | 28 (3)   | 20 (2)     | 2 (1)    | 7 (4)    | 30 (3)   | 27 (2.25)  |

**VL Invasion**

|            |          |          |         |         |          |          |
|------------|----------|----------|---------|---------|----------|----------|
| Reported   | 517 (51) | 516 (51) | 88 (49) | 99 (52) | 605 (51) | 615 (51) |
| Unreported | 492 (49) | 496 (49) | 92 (51) | 91 (48) | 584 (49) | 587 (49) |

---

ER status=Estrogen Receptor Status; VL=Vascular/Lymphatic

**Supplement Table 4 – Relapse, Death and Second Malignancies Details**

|                                         | ECMF (N=1189) |    | CMF (N=1202) |    | Total (N=2391) |    |
|-----------------------------------------|---------------|----|--------------|----|----------------|----|
|                                         | N             | %  | N            | %  | N              | %  |
| <b>Relapsed patients</b>                | 206           | 17 | 285          | 24 | 491            | 21 |
| <b>Type of relapse*</b>                 |               |    |              |    |                |    |
| Loco-regional                           | 45            | 4  | 72           | 6  | 117            | 5  |
| Distant                                 | 189           | 16 | 263          | 22 | 452            | 19 |
| <b>Site of first distant relapse **</b> |               |    |              |    |                |    |
| Bone                                    | 80            | 42 | 122          | 46 | 202            | 45 |
| Liver                                   | 56            | 30 | 80           | 30 | 136            | 30 |
| Lung                                    | 39            | 21 | 58           | 22 | 97             | 21 |
| SCF                                     | 20            | 11 | 29           | 11 | 49             | 11 |
| Brain                                   | 24            | 13 | 19           | 7  | 43             | 10 |
| Contralateral breast                    | 3             | 2  | 2            | 1  | 5              | 1  |
| Other                                   | 10            | 5  | 15           | 6  | 25             | 6  |
| Unknown                                 | 3             | 2  | 1            | 1  | 4              | 1  |
| <b>Dead patients</b>                    | 171           | 14 | 242          | 20 | 413            | 17 |
| <b>Relapsed or Dead patients</b>        | 230           | 19 | 315          | 26 | 545            | 23 |
| <b>Second malignancies</b>              | 27            | 2  | 28           | 2  | 55             | 2  |
| <b>Site</b>                             |               |    |              |    |                |    |
| Contralateral breast                    | 15            | 55 | 12           | 43 | 27             | 49 |
| Endometrial                             | 1             | 4  | 4            | 14 | 5              | 9  |
| AML +/- myelodysplasia                  | 0             | 0  | 0            | 0  | 0              | 0  |
| Other                                   | 11            | 41 | 12           | 43 | 23             | 42 |

\* Some patients have had loco-regional and distant relapses; \*\* Some patients have a first distant relapse in more than one site; AML = Acute myeloid leukaemia

# Supplement Figure 5 – Relapse-free survival by treatment

## A) By Patients Characteristics

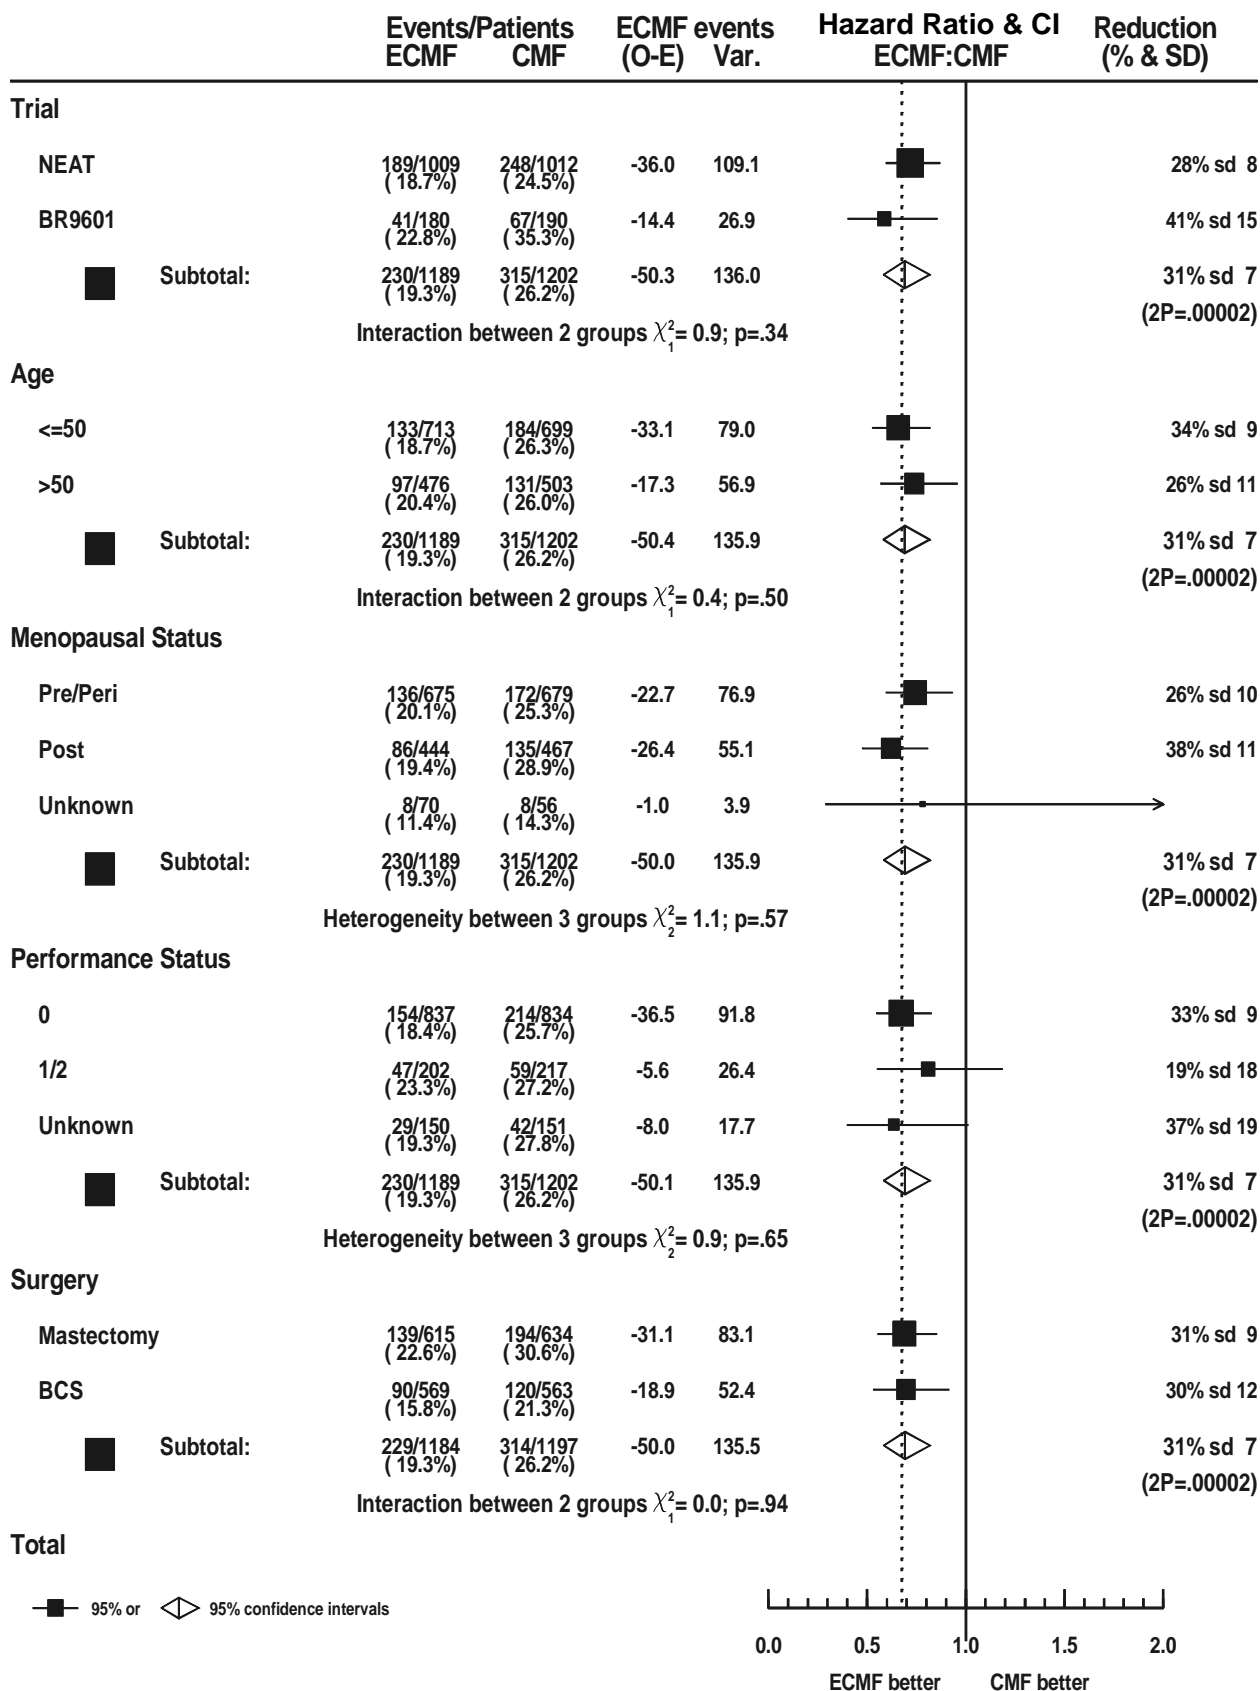

## B) By Tumour Characteristics

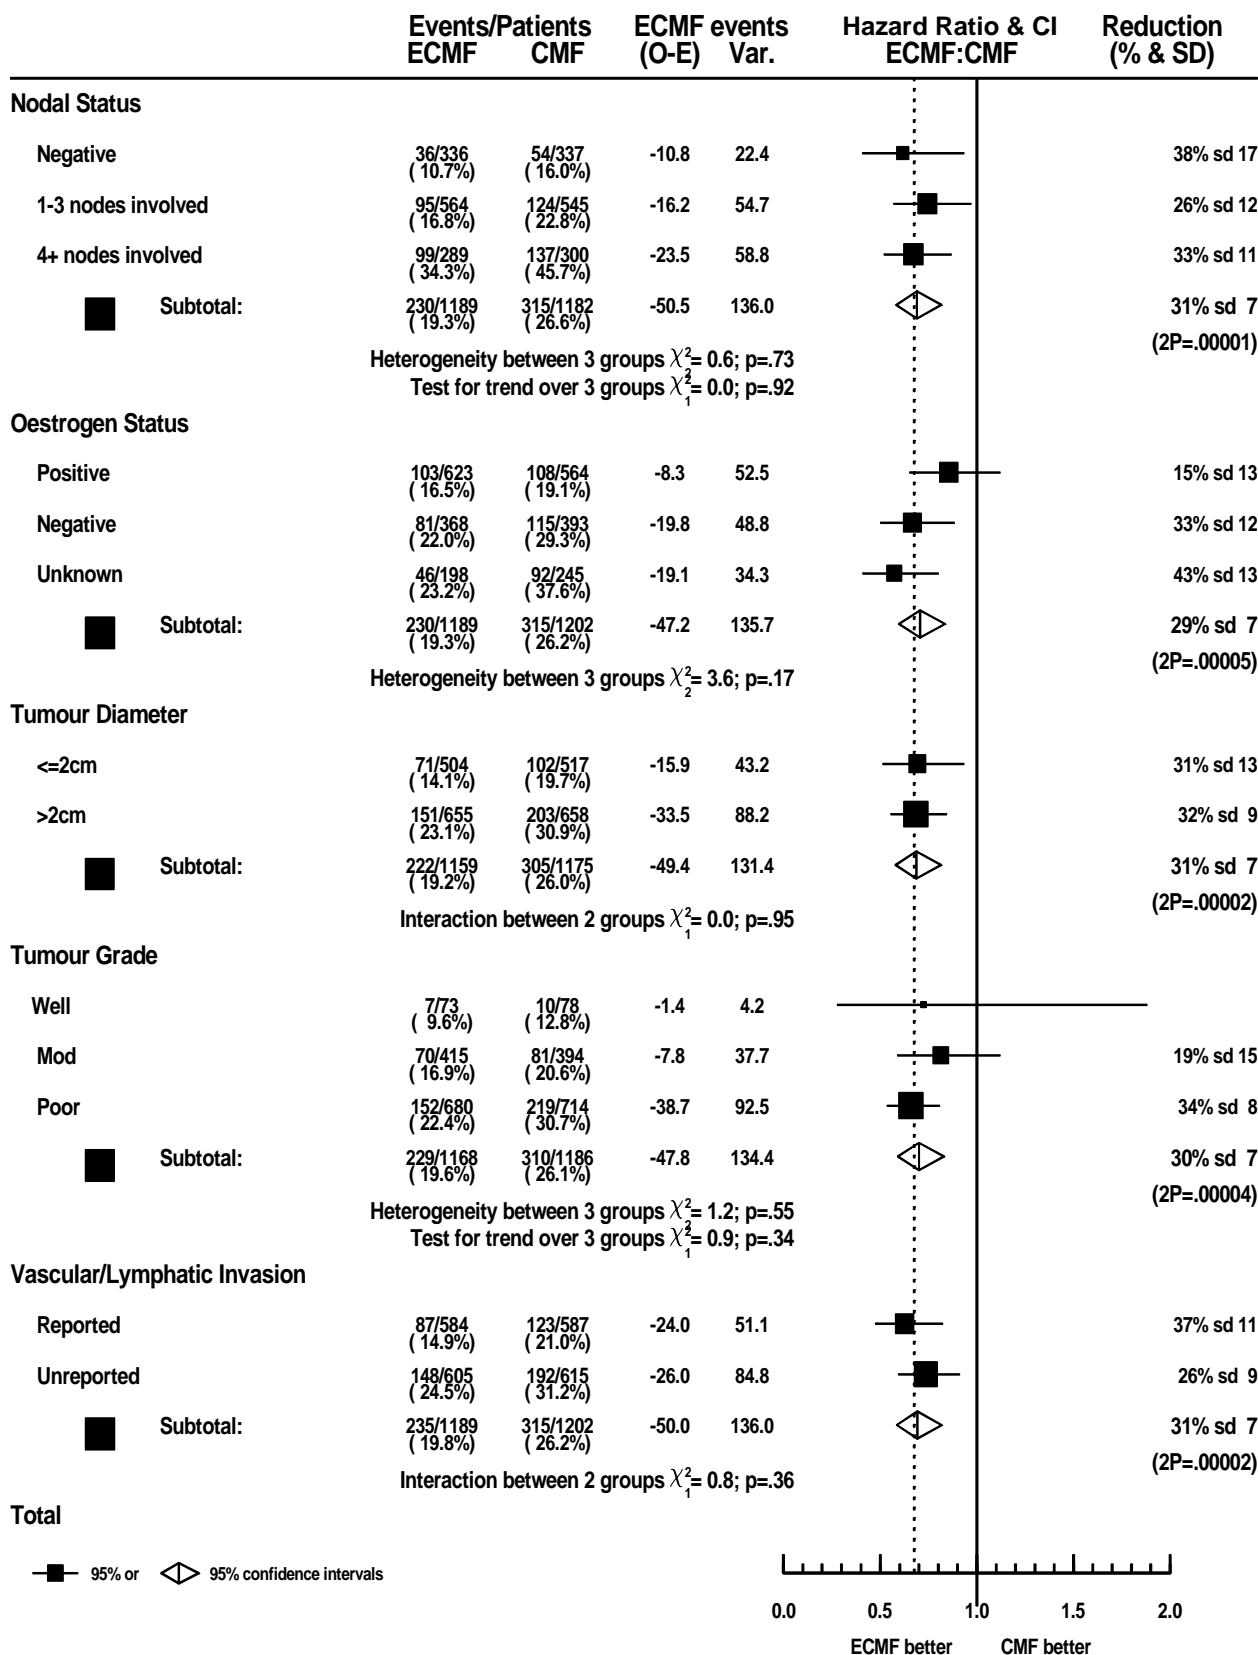

**Supplement Table 6 – Cox Proportional Hazards Modelling for RFS**

| <b>Factor</b>        | <b>Grouping</b>          | <b>HR (95%CI)</b>  | <b>p</b> |
|----------------------|--------------------------|--------------------|----------|
| <b>Nodal Status*</b> | (Negative, Positive)     | 3.43 (2.63 – 4.48) | <0.001   |
| <b>Nodal Status*</b> | (1-3 nodes versus other) | 2.13 (1.77 – 2.58) | <0.001   |
| <b>Tumor grade</b>   | (Well, Mod, Poor)        | 1.61 (1.36 – 1.91) | <0.001   |
| <b>Tumor size</b>    | (≤2cm, >2cm)             | 1.51 (1.25 – 1.81) | <0.001   |
| <b>Treatment</b>     | (CMF, ECMF)              | 0.69 (0.58 – 0.83) | <0.001   |
| <b>ER Status^</b>    | (Positive, Other)        | 1.41 (1.17 – 1.69) | <0.001   |
| <b>VL Invasion</b>   | (Reported/Unreported)    | 0.78 (0.65 – 0.94) | 0.01     |

\* The 3 level nodal status factor is entered into the model using 2 dummy variables.

^ The estrogen factor is created using 2 dummy variables (to allow for unknowns) although only 1 is entered into the model.

Hazard ratios and p-values are from a multivariate analysis

**Supplement Table 7 – Studies evaluating Epirubicin-based adjuvant chemotherapy (including Early Breast Cancer Trialists Collaborative Group meta-analysis for anthracycline-based regimens)**

| Study           | No. Patients | Regimen (No. patients)             | Relative Risk Reduction |       |
|-----------------|--------------|------------------------------------|-------------------------|-------|
|                 |              |                                    | Relapse/Death           | Death |
| <i>NEAT</i>     | 2021         | ECMF (1009) vs CMF (1012)          | 28%                     | 30%   |
| BR9601          | 370          | ECMF (180) vs CMF (190)            | 41%                     | 43%   |
| NCIC CTG [23]   | 710          | CEF 120 (351) vs CMF (359)         | 23%                     | 18%   |
| <b>Subtotal</b> | <b>3101</b>  |                                    |                         |       |
| EBCTCG [25]     | 4840         | Anthracycline (2420) vs CMF (2420) | 11%                     | 12%   |
| <b>TOTAL</b>    | <b>7941</b>  |                                    |                         |       |

No. patients = number of patients included in relative risk reduction analyses
